# Supplementary material for: AGE-RAGE signal generates a specific NF-κB RelA “barcode” that directs collagen I expression
Source: PubMed Central journal article supplement (PMC4700418; doi:10.1038/srep18822), 2016-01-05

# AGE-RAGE signal generates a specific NF- $\kappa$ B RelA “barcode” that directs collagen I expression

Yunqian Peng\*, Ji-Min Kim\*, Hal-Sol Park, Annie Yang, Celia Islam, Edward G. Lakatta & Li Lin<sup>¶</sup>

<sup>1</sup>Laboratory of Cardiovascular Sciences, National Institute on Aging, National Institute of Health, Baltimore, MD 21224.

\*These authors contribute equally to this work.

<sup>¶</sup>Correspondence and requests for material should be addressed to L. L. ([linli@mail.nih.gov](mailto:linli@mail.nih.gov))

## SUPPLEMENTAL INFORMATION

### Additional Methods

**Vessel section and H & E staining.** Thoracic aortas isolated from mice were fixed in 4% paraformaldehyde and embedded in paraffin. The paraffin block was then sectioned to 5  $\mu$ m cross-sections. Rhesus monkey abdominal aorta sections were obtained from Dr. Mingyi Wang, NIA, NIH. The aorta sections were routinely stained with hematoxylin and eosin (H & E). Digital images of stained sections were obtained from light microscopy (Zeiss Axiovert 200) using polarized filters.

**Immunohistochemistry (IHC).** A standard avidin–biotin complex method was used for immunohistochemistry. Briefly, vessel sections were deparaffinized with xylene and rehydrated through gradient ethanol immersion. Sections were then microwaved for 5 min in citric acid buffer (2 mM citric acid and 9 mM trisodium citrate dehydrate, pH 6.0) to retrieve antigens. After washing with 1 x PBS, the slides were treated with peroxidase blocking buffer for 10 min

to quench endogenous peroxidase activity and blocked with serum blocking solution (Invitrogen) at room temperature for 1 h following washing and incubation with primary antibodies. Rabbit polyclonal anti-RAGE (1:1,000dilution), rabbit polyclonal anti-AGE (1:10,000dilution) and rabbit polyclonal anti-collagen 1 antibodies (1:500) were from Abcam. The specimens were then incubated with biotinylated secondary antibodies (Invitrogen), washed with Tris-buffered saline containing 0.1 % Tween-20, and re-incubated with streptavidin-horseradish peroxidase (Invitrogen) for detection. The sections were then counterstained with hematoxylin, rinsed, dehydrated, and mounted with mounting medium. The staining was visualized with a diaminobenzidine liquid substrate system (Vector Laboratory), and digitally captured with Zeiss Axiovert 200 microscope. Same quantitative analyses described in last method section were used for the IHC specimens. One-way ANOVA and post hoc Turkey's test are used determine significant differences between groups. The analysis was performed using GraphPad Prism 6 statistical program.  $P < 0.05$  was considered to be significant.

### **Supplemental figure legends**

**Figure S1** Aging-associated AGEs, RAGE and collagen I increase in murine aortas. Thoracic aortas isolated from young (8 – 9 weeks) and old (40 – 45 weeks) male mice (WT and RAGE-null) were examined for (A) RAGE expression; (B) AGEs accumulation; (C) collagen I expression; (D) general histomorphology (H & E). The left panels are the representative staining samples from young and old animals; the right panels are the overall assessment. Four mice ( $n = 4$ ) are in each group, and four randomly selected sections from each animal were analyzed. The data were presented as mean  $\pm$  SEM, \*  $p < 0.05$ ; \*\*  $p < 0.01$ ; \*\*\*  $p < 0.001$ .

**Figure S2** Aging-associated AGE, RAGE and collagen I increase in rhesus monkey aortas. Abdominal aortas isolated from young (8 – 12 years) and old (23 – 25 years) rhesus monkeys

were examined for (A) RAGE expression; (B) AGEs accumulation; (C) collagen I expression. The left panels are representative aorta staining samples from young and old animals, the right panels are the overall assessment. Aortas from four young, and old monkeys (n = 4), and four randomly selected sections from each animal were analyzed. The data were presented as mean  $\pm$  SEM, \*  $p < 0.05$ .

**Figure S3** AGEs stimulation does not induce RelA acetylation. (A) Immunoblotting of RelA acetyl lysine in anti-RelA antibodies precipitated AGEs-stimulated MEFs; (B) qRT-PCR analyses of transcription of *coll1a1* and *coll1a2* genes in AGEs-induced MEFs reconstituted with RelA (K218R/K221R/K310R). The data were presented as mean  $\pm$  SEM, \*  $p < 0.05$ . (C) Western blot using anti-RelA antibodies confirms the expression of RelA (K218R/K221R/K310R) and controls in MEFs.

**Figure S4** AGEs stimulation induces phosphorylation of RelA S311 and T254 residues. MEF cells were treated with AGEs (50  $\mu\text{g/ml}$ ) and harvested at time points indicated. The cell lysates were resolved in SDS 4–12% gel and immunoblotted with anti-RelA, anti-p-RelA-T254, and anti-p-RelA-S311 antibodies (Abcam). (A) Time point of AGEs-induced RelA T254 and S311 phosphorylation, representative western blot; (B) and (C) Densitometric analyses of three western blots of (A); (D) and (E) pharmacological inhibitors treatment of MEFs induced with AGEs. Cells were pre-treated with the indicated inhibitor. After 1 h AGEs induction, the obtained cell lysates (10  $\mu\text{g}$  of total protein) were resolved with SDS 4-12% precast gel and with anti-RelA, anti-p-RelA-T254 (D), and anti-p-RelA-S311 (E) antibodies. Anti-  $\beta$  actin antibodies were used as a loading control.

### Supplemental Table S1

Primers used in ChIP assays.

| Gene          | Forward primer         | Reverse primer         | Locus |
|---------------|------------------------|------------------------|-------|
| <i>col1a1</i> | GGGCAAAGATCCTGAGTTCC   | AATCCTCTTGCCCAGTCTCC   | -8618 |
| <i>col1a1</i> | GGGCTAGGTTTCACAAAGGA   | TGGGGAGTATTGCTCTCAAG   | -7831 |
| <i>col1a1</i> | CCCACCATGCTCCCTTCC     | GCAGCAGATGTGGGAGAGAC   | -7082 |
| <i>col1a1</i> | CCGAGAGGCAGGGTTCCT     | GGGGTTAGCTTCGGCTCA     | +4    |
| <i>col1a2</i> | TCCAAGCTGCAAAAATAAATTT | CAACTGTGGAGGTCTTATTGTG | -9355 |
| <i>col1a2</i> | TTTGATCTTTTGGGTGCT     | GAGCCCAGGTGACTCATTG    | -8034 |
| <i>col1a2</i> | GAGTTCTGGGGAGTTAGCC    | CATCAGCAATCATTAATAAATC | -5906 |
| <i>col1a2</i> | TGTAAGTCAGAGAGGGCATCTA | CATAACTCAGAGGGATGTGC   | -5386 |

**Figure S1**

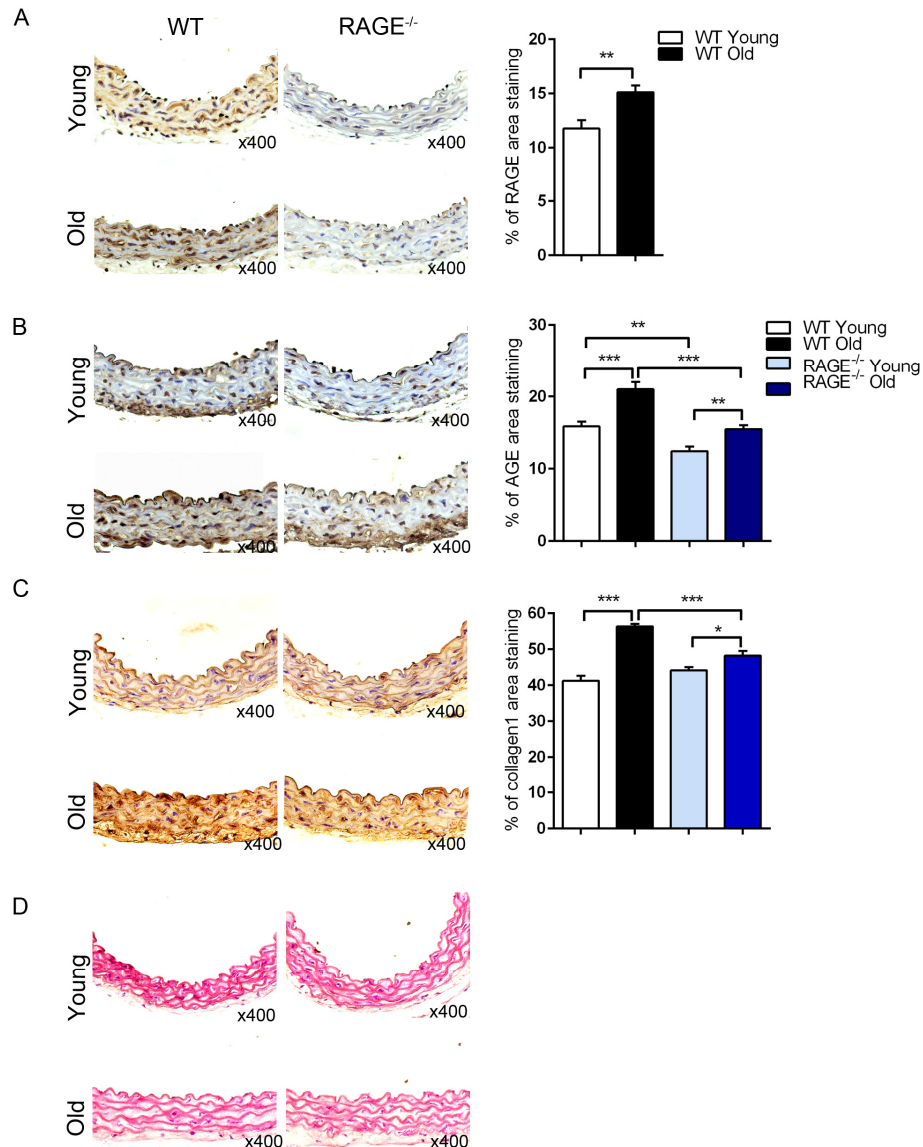

**Figure S2**

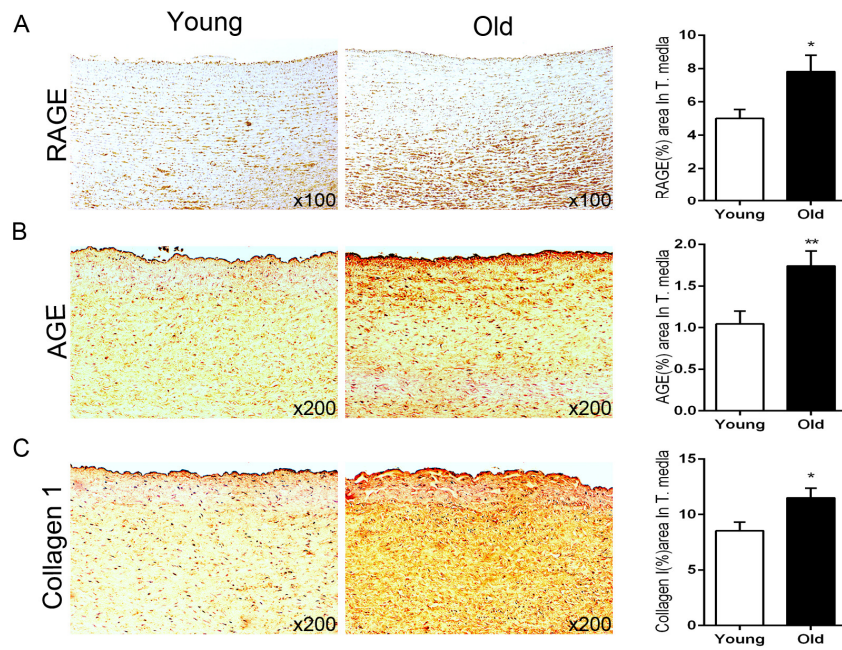

**Figure S3**

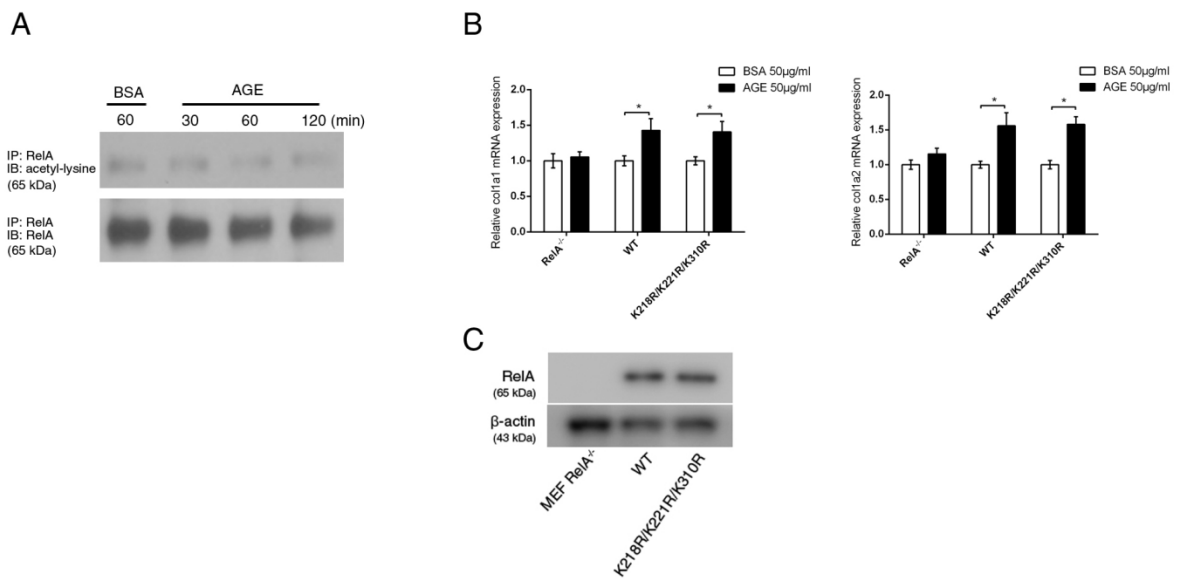

**Figure S4**

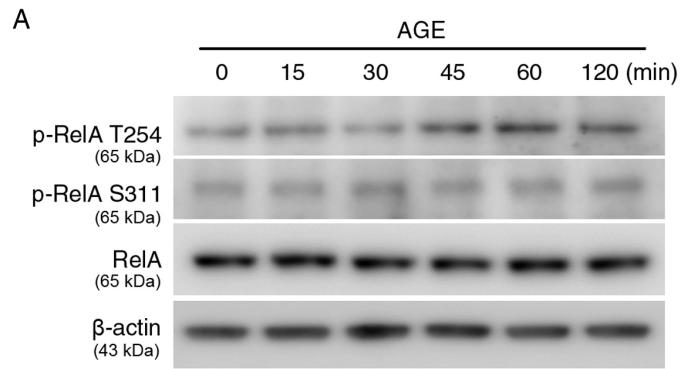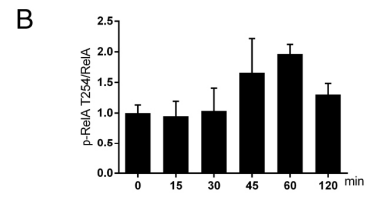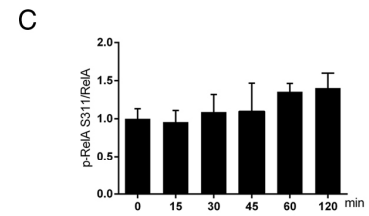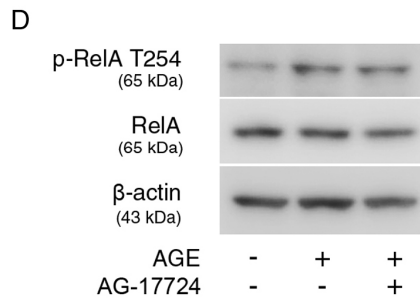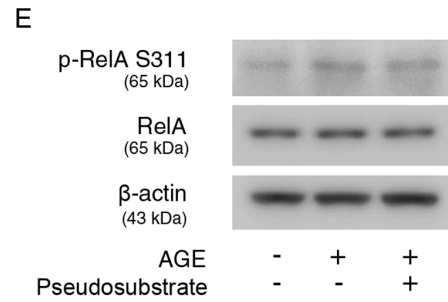

Supplement: srep18822-s1.pdf [file srep18822-s1.pdf]
